# Supplementary material
Source: Springer Nature journal article supplement (https://www.springermedizin.de/resource/supplementary/13014_2009_160_MOESM3_ESM.pdf/9633032)

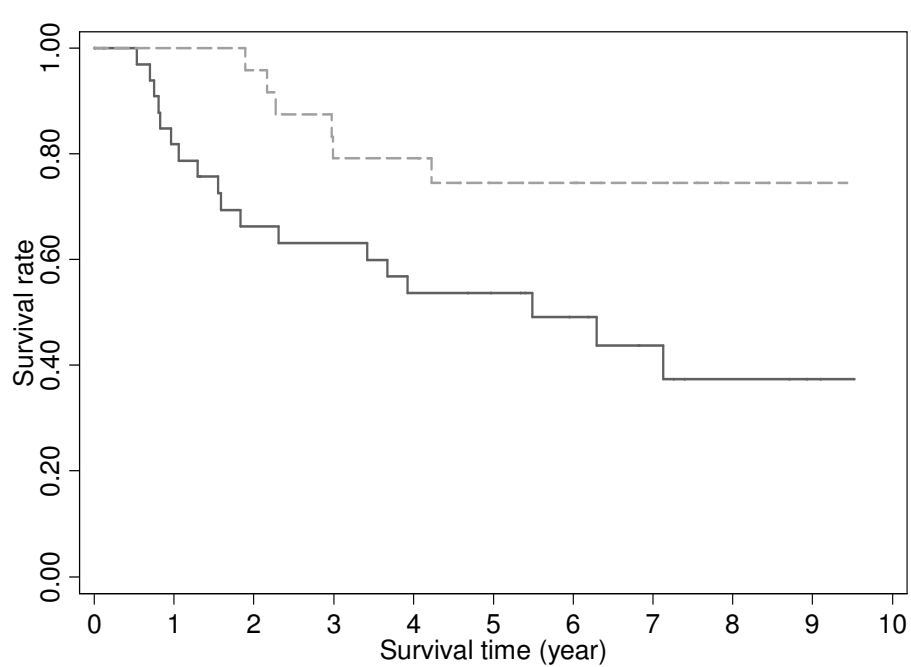

**A**

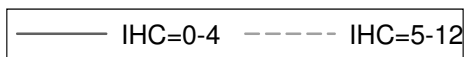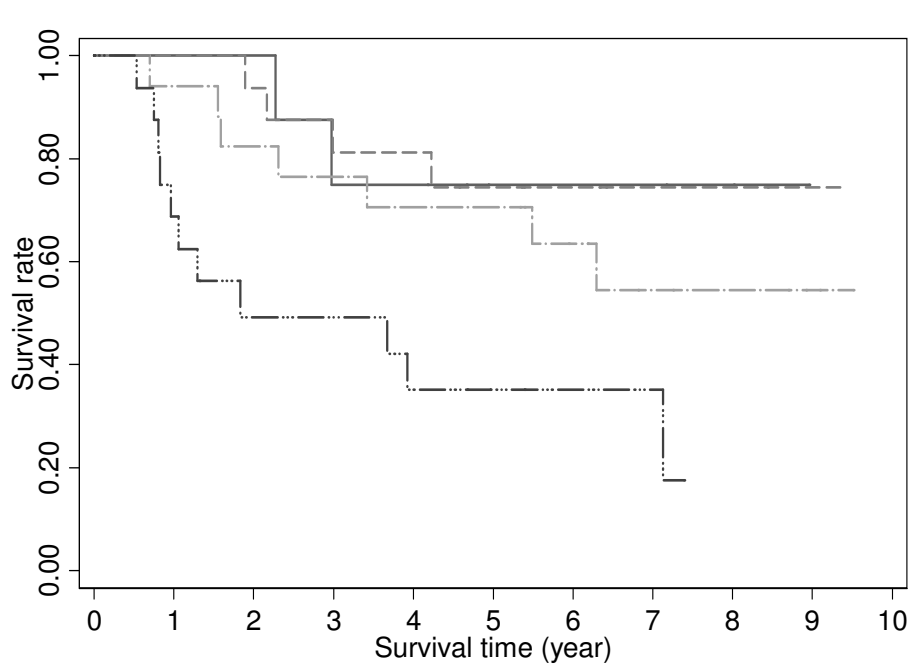

**B**

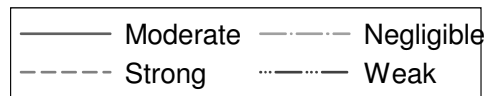

Supplement: MOESM3 [file 9633032]
